# Supplementary material for: Evaluating Nuclear Membrane Irregularity for the Classification of Cervical Squamous Epithelial Cells
Source: PLoS One. 2016 Oct 14;11(10):e0164389. doi: 10.1371/journal.pone.0164389 (PMC5065206; doi:10.1371/journal.pone.0164389)
Supplement: S2 Table — (DOC) [file pone.0164389.s005.doc]

**Table S2. Adjusted *p*-value (APVs) by Holm, Shaffer’s static, and Bergmann-Hommel’s dynamic (Berg) for penalty-driven smoothing analysis with span = 3.**

| i | Hypothesis | Unadjusted pi | | APVHolm | | APVShaffer | | APVBerg | |
| --- | --- | --- | --- | --- | --- | --- | --- | --- | --- |
| Linear | |  |  | |  | |  | |  |
| 1 | NILM vs. HSIL | 0 | | 0 | | 0 | | 0 | |
| 2 | NILM vs. LSIL | 0.002288 | | 0.004577 | | 0.002288 | | 0.002288 | |
| 3 | LSIL vs. HSIL | 0.021448 | | 0.021448 | | 0.021448 | | 0.021448 | |
| Quadratic | |  |  | |  | |  | |  |
| 1 | NILM vs. HSIL | 0.014286 | | 0.042857 | | 0.042857 | | 0.042857 | |
| 2 | LSIL vs. HSIL | 0.193601 | | 0.387202 | | 0.193601 | | 0.193601 | |
| 3 | NILM vs. LSIL | 0.250144 | | 0.387202 | | 0.250144 | | 0.250144 | |
| Cubic | |  |  | |  | |  | |  |
| 1 | LSIL vs. HSIL | 0.271332 | | 0.813996 | | 0.813996 | | 0.813996 | |
| 2 | NILM vs. LSIL | 0.582319 | | 1.164639 | | 0.813996 | | 0.813996 | |
| 3 | NILM vs. HSIL | 0.582319 | | 1.164639 | | 0.813996 | | 0.813996 | |
